# Supplementary material for: Exome sequencing in schizophrenic patients with high levels of homozygosity identifies novel and extremely rare mutations in the GABA/glutamatergic pathways
Source: PubMed Central journal article supplement (PMC5546675; doi:10.1371/journal.pone.0182778), 2017-08-07
Supplement: pone.0182778.s001.pdf [file pone.0182778.s001.pdf]

**S1 Table. ROH regions identified in ROH-individuals**

| Sample       | Chromosome | Start position | End position | Length (bp) | N. SNPs | N. Missings <sup>a</sup> | N. Heterozygotes <sup>b</sup> |
|--------------|------------|----------------|--------------|-------------|---------|--------------------------|-------------------------------|
| Patient N° 1 | 1          | 237 774 614    | 241 183 190  | 3 408 576   | 602     | 2                        | 1                             |
| Patient N° 1 | 2          | 32 190 504     | 36 112 278   | 3 921 774   | 579     | 5                        | 1                             |
| Patient N° 1 | 2          | 36 135 389     | 38 512 063   | 2 376 674   | 503     | 3                        | 1                             |
| Patient N° 1 | 2          | 38 542 573     | 43 190 388   | 4 647 815   | 677     | 4                        | 1                             |
| Patient N° 1 | 2          | 188 684 507    | 189 855 674  | 1 171 167   | 77      | 0                        | 1                             |
| Patient N° 1 | 3          | 57 074 218     | 58 232 659   | 1 158 441   | 107     | 1                        | 1                             |
| Patient N° 1 | 3          | 185 048 314    | 188 870 822  | 3 822 508   | 634     | 5                        | 1                             |
| Patient N° 1 | 3          | 188 878 969    | 190 286 886  | 1 407 917   | 262     | 2                        | 1                             |
| Patient N° 1 | 6          | 46 867 717     | 49 751 612   | 2 883 895   | 285     | 2                        | 1                             |
| Patient N° 1 | 6          | 49 778 621     | 52 612 904   | 2 834 283   | 316     | 3                        | 1                             |
| Patient N° 1 | 6          | 65 906 330     | 66 904 407   | 998 077     | 103     | 0                        | 1                             |
| Patient N° 1 | 7          | 68 891 147     | 70 046 675   | 1 155 528   | 69      | 0                        | 1                             |
| Patient N° 1 | 7          | 138 764 060    | 152 653 503  | 13 889 443  | 1481    | 5                        | 1                             |
| Patient N° 1 | 10         | 32 537 928     | 33 563 893   | 1 025 965   | 116     | 0                        | 1                             |
| Patient N° 1 | 10         | 102 884 730    | 103 922 896  | 1 038 166   | 65      | 0                        | 1                             |
| Patient N° 1 | 11         | 206 767        | 4 099 051    | 3 892 284   | 414     | 2                        | 1                             |
| Patient N° 1 | 11         | 133 051 091    | 134 893 915  | 1 842 824   | 425     | 5                        | 0                             |
| Patient N° 1 | 12         | 25 138 016     | 27 698 751   | 2 560 735   | 407     | 5                        | 1                             |
| Patient N° 1 | 12         | 60 093 791     | 61 383 227   | 1 289 436   | 75      | 0                        | 1                             |
| Patient N° 1 | 13         | 70 997 511     | 72 765 304   | 1 767 793   | 229     | 2                        | 1                             |
| Patient N° 1 | 13         | 72 771 714     | 75 810 761   | 3 039 047   | 476     | 1                        | 1                             |
| Patient N° 1 | 13         | 82 315 799     | 90 151 254   | 7 835 455   | 642     | 4                        | 1                             |
| Patient N° 1 | 16         | 59 512 010     | 60 996 700   | 1 484 690   | 180     | 1                        | 1                             |
| Patient N° 1 | 18         | 48 194 641     | 50 150 118   | 1 955 477   | 237     | 1                        | 1                             |
| Patient N° 1 | 22         | 39 756 854     | 46 459 132   | 6 702 278   | 787     | 5                        | 1                             |
| Patient N° 1 | 22         | 46 480 602     | 50 921 694   | 4 441 092   | 892     | 5                        | 1                             |
| Patient N° 2 | 1          | 67 526 029     | 70 225 340   | 2 699 311   | 317     | 5                        | 1                             |
| Patient N° 2 | 1          | 75 280 496     | 76 627 868   | 1 347 372   | 134     | 2                        | 1                             |
| Patient N° 2 | 1          | 76 975 717     | 80 150 181   | 3 174 464   | 328     | 5                        | 1                             |
| Patient N° 2 | 1          | 234 801 409    | 237 087 952  | 2 286 543   | 291     | 5                        | 1                             |
| Patient N° 2 | 2          | 1 318 413      | 2 608 466    | 1 290 053   | 188     | 5                        | 1                             |

|                     |   |             |             |           |     |   |   |
|---------------------|---|-------------|-------------|-----------|-----|---|---|
| <b>Patient N° 2</b> | 2 | 4 034 446   | 5 258 167   | 1 223 721 | 205 | 5 | 1 |
| <b>Patient N° 2</b> | 2 | 34 538 100  | 36 420 568  | 1 882 468 | 249 | 5 | 1 |
| <b>Patient N° 2</b> | 2 | 37 023 044  | 38 693 158  | 1 670 114 | 311 | 5 | 1 |
| <b>Patient N° 2</b> | 2 | 38 847 132  | 40 332 851  | 1 485 719 | 134 | 5 | 1 |
| <b>Patient N° 2</b> | 2 | 40 539 251  | 42 258 948  | 1 719 697 | 299 | 5 | 1 |
| <b>Patient N° 2</b> | 2 | 42 267 462  | 43 574 242  | 1 306 780 | 204 | 5 | 1 |
| <b>Patient N° 2</b> | 2 | 45 061 926  | 46 456 582  | 1 394 656 | 380 | 5 | 1 |
| <b>Patient N° 2</b> | 2 | 188 072 104 | 189 118 320 | 1 046 216 | 72  | 0 | 1 |
| <b>Patient N° 2</b> | 2 | 206 464 465 | 207 948 857 | 1 484 392 | 221 | 3 | 1 |
| <b>Patient N° 2</b> | 3 | 46 656 351  | 50 158 191  | 3 501 840 | 80  | 3 | 1 |
| <b>Patient N° 2</b> | 3 | 114 206 587 | 115 239 407 | 1 032 820 | 75  | 1 | 1 |
| <b>Patient N° 2</b> | 3 | 137 662 094 | 139 974 934 | 2 312 840 | 214 | 5 | 1 |
| <b>Patient N° 2</b> | 4 | 4 391 648   | 5 975 174   | 1 583 526 | 387 | 5 | 1 |
| <b>Patient N° 2</b> | 4 | 32 606 917  | 35 911 736  | 3 304 819 | 186 | 5 | 0 |
| <b>Patient N° 2</b> | 4 | 35 931 138  | 37 518 563  | 1 587 425 | 232 | 5 | 1 |
| <b>Patient N° 2</b> | 4 | 39 410 182  | 41 222 268  | 1 812 086 | 267 | 5 | 1 |
| <b>Patient N° 2</b> | 4 | 41 769 950  | 47 308 849  | 5 538 899 | 457 | 5 | 0 |
| <b>Patient N° 2</b> | 4 | 53 067 343  | 55 201 854  | 2 134 511 | 205 | 5 | 0 |
| <b>Patient N° 2</b> | 4 | 55 921 535  | 59 214 630  | 3 293 095 | 422 | 5 | 1 |
| <b>Patient N° 2</b> | 4 | 59 907 023  | 64 381 142  | 4 474 119 | 390 | 5 | 0 |
| <b>Patient N° 2</b> | 4 | 65 436 643  | 68 412 148  | 2 975 505 | 302 | 5 | 1 |
| <b>Patient N° 2</b> | 4 | 68 976 217  | 73 530 159  | 4 553 942 | 298 | 5 | 1 |
| <b>Patient N° 2</b> | 4 | 73 575 684  | 75 279 982  | 1 704 298 | 112 | 5 | 1 |
| <b>Patient N° 2</b> | 4 | 100 575 711 | 101 942 847 | 1 367 136 | 142 | 4 | 1 |
| <b>Patient N° 2</b> | 4 | 134 026 066 | 135 775 238 | 1 749 172 | 109 | 1 | 1 |
| <b>Patient N° 2</b> | 4 | 166 337 135 | 169 017 774 | 2 680 639 | 273 | 2 | 1 |
| <b>Patient N° 2</b> | 4 | 169 686 795 | 172 560 014 | 2 873 219 | 233 | 1 | 1 |
| <b>Patient N° 2</b> | 4 | 172 949 886 | 175 376 524 | 2 426 638 | 227 | 4 | 1 |
| <b>Patient N° 2</b> | 4 | 175 621 502 | 179 527 417 | 3 905 915 | 498 | 5 | 1 |
| <b>Patient N° 2</b> | 4 | 179 536 770 | 181 266 629 | 1 729 859 | 261 | 5 | 1 |
| <b>Patient N° 2</b> | 4 | 181 289 859 | 182 397 985 | 1 108 126 | 269 | 5 | 1 |
| <b>Patient N° 2</b> | 5 | 98 726 889  | 99 982 292  | 1 255 403 | 79  | 2 | 1 |
| <b>Patient N° 2</b> | 6 | 27 312 078  | 28 502 550  | 1 190 472 | 68  | 1 | 1 |

|                     |    |             |             |           |     |   |   |
|---------------------|----|-------------|-------------|-----------|-----|---|---|
| <b>Patient N° 2</b> | 6  | 120 386 153 | 121 862 617 | 1 476 464 | 105 | 3 | 1 |
| <b>Patient N° 2</b> | 6  | 131 845 152 | 133 610 298 | 1 765 146 | 237 | 5 | 1 |
| <b>Patient N° 2</b> | 6  | 133 710 214 | 137 882 681 | 4 172 467 | 453 | 5 | 1 |
| <b>Patient N° 2</b> | 6  | 140 024 345 | 144 535 974 | 4 511 629 | 425 | 5 | 1 |
| <b>Patient N° 2</b> | 6  | 145 635 385 | 148 671 794 | 3 036 409 | 328 | 5 | 1 |
| <b>Patient N° 2</b> | 6  | 149 293 235 | 150 476 086 | 1 182 851 | 131 | 5 | 1 |
| <b>Patient N° 2</b> | 6  | 164 049 551 | 165 798 963 | 1 749 412 | 325 | 5 | 0 |
| <b>Patient N° 2</b> | 7  | 55 724 445  | 56 819 848  | 1 095 403 | 66  | 1 | 1 |
| <b>Patient N° 2</b> | 7  | 89 687 264  | 90 695 079  | 1 007 815 | 103 | 1 | 1 |
| <b>Patient N° 2</b> | 7  | 111 782 891 | 113 040 467 | 1 257 576 | 135 | 3 | 1 |
| <b>Patient N° 2</b> | 7  | 123 855 871 | 124 935 779 | 1 079 908 | 89  | 0 | 1 |
| <b>Patient N° 2</b> | 7  | 145 422 195 | 146 577 200 | 1 155 005 | 96  | 0 | 1 |
| <b>Patient N° 2</b> | 7  | 151 548 007 | 152 726 381 | 1 178 374 | 119 | 4 | 1 |
| <b>Patient N° 2</b> | 7  | 152 801 121 | 154 246 735 | 1 445 614 | 266 | 5 | 1 |
| <b>Patient N° 2</b> | 8  | 51 654 055  | 52 929 150  | 1 275 095 | 87  | 2 | 1 |
| <b>Patient N° 2</b> | 8  | 67 194 171  | 68 568 185  | 1 374 014 | 69  | 1 | 1 |
| <b>Patient N° 2</b> | 10 | 57 720 276  | 58 803 817  | 1 083 541 | 81  | 1 | 1 |
| <b>Patient N° 2</b> | 10 | 124 586 574 | 125 942 586 | 1 356 012 | 242 | 5 | 1 |
| <b>Patient N° 2</b> | 10 | 125 954 944 | 128 424 324 | 2 469 380 | 431 | 5 | 1 |
| <b>Patient N° 2</b> | 10 | 128 581 683 | 129 631 391 | 1 049 708 | 219 | 5 | 0 |
| <b>Patient N° 2</b> | 10 | 129 651 938 | 130 769 970 | 1 118 032 | 262 | 5 | 1 |
| <b>Patient N° 2</b> | 10 | 134 313 336 | 135 434 551 | 1 121 215 | 88  | 5 | 1 |
| <b>Patient N° 2</b> | 11 | 88 286 929  | 89 904 336  | 1 617 407 | 77  | 3 | 1 |
| <b>Patient N° 2</b> | 12 | 52 799 301  | 54 316 307  | 1 517 006 | 183 | 5 | 1 |
| <b>Patient N° 2</b> | 12 | 55 214 165  | 57 163 316  | 1 949 151 | 124 | 5 | 1 |
| <b>Patient N° 2</b> | 12 | 57 208 230  | 61 001 641  | 3 793 411 | 314 | 5 | 1 |
| <b>Patient N° 2</b> | 12 | 61 019 462  | 62 455 504  | 1 436 042 | 122 | 5 | 0 |
| <b>Patient N° 2</b> | 13 | 89 275 195  | 90 506 508  | 1 231 313 | 84  | 1 | 1 |
| <b>Patient N° 2</b> | 15 | 23 046 404  | 24 583 066  | 1 536 662 | 155 | 4 | 1 |
| <b>Patient N° 2</b> | 15 | 25 033 395  | 26 181 335  | 1 147 940 | 213 | 5 | 0 |
| <b>Patient N° 2</b> | 15 | 26 278 561  | 27 343 875  | 1 065 314 | 187 | 5 | 1 |
| <b>Patient N° 2</b> | 15 | 27 412 578  | 29 426 782  | 2 014 204 | 153 | 5 | 1 |
| <b>Patient N° 2</b> | 15 | 63 469 846  | 66 428 824  | 2 958 978 | 213 | 5 | 1 |

|                     |    |             |             |            |      |   |   |
|---------------------|----|-------------|-------------|------------|------|---|---|
| <b>Patient N° 2</b> | 15 | 66 929 574  | 68 611 489  | 1 681 915  | 213  | 5 | 1 |
| <b>Patient N° 2</b> | 15 | 68 686 077  | 70 967 554  | 2 281 477  | 274  | 5 | 1 |
| <b>Patient N° 2</b> | 19 | 37 048 117  | 39 088 461  | 2 040 344  | 112  | 5 | 1 |
| <b>Patient N° 2</b> | 19 | 39 152 908  | 40 251 805  | 1 098 897  | 107  | 5 | 0 |
| <b>Patient N° 2</b> | 19 | 40 347 035  | 43 646 784  | 3 299 749  | 193  | 5 | 1 |
| <b>Patient N° 3</b> | 1  | 7 245 434   | 12 915 847  | 5 670 413  | 600  | 5 | 0 |
| <b>Patient N° 3</b> | 1  | 13 821 129  | 15 188 019  | 1 366 890  | 281  | 1 | 1 |
| <b>Patient N° 3</b> | 2  | 41 179 801  | 45 380 085  | 4 200 284  | 688  | 5 | 1 |
| <b>Patient N° 3</b> | 2  | 203 532 304 | 204 825 286 | 1 292 982  | 76   | 0 | 1 |
| <b>Patient N° 3</b> | 4  | 32 301 265  | 33 642 614  | 1 341 349  | 69   | 0 | 1 |
| <b>Patient N° 3</b> | 5  | 175 078 991 | 176 130 808 | 1 051 817  | 105  | 0 | 1 |
| <b>Patient N° 3</b> | 6  | 28 077 374  | 29 353 408  | 1 276 034  | 89   | 0 | 1 |
| <b>Patient N° 3</b> | 6  | 108 856 449 | 110 690 440 | 1 833 991  | 163  | 0 | 1 |
| <b>Patient N° 3</b> | 6  | 121 884 929 | 126 215 101 | 4 330 172  | 501  | 2 | 1 |
| <b>Patient N° 3</b> | 6  | 127 414 801 | 134 625 104 | 7 210 303  | 881  | 5 | 0 |
| <b>Patient N° 3</b> | 6  | 134 630 783 | 138 259 865 | 3 629 082  | 390  | 5 | 1 |
| <b>Patient N° 3</b> | 8  | 60 540 056  | 61 818 964  | 1 278 908  | 107  | 0 | 1 |
| <b>Patient N° 3</b> | 8  | 68 541 850  | 72 864 240  | 4 322 390  | 565  | 2 | 1 |
| <b>Patient N° 3</b> | 9  | 15 973 712  | 23 078 402  | 7 104 690  | 1343 | 5 | 1 |
| <b>Patient N° 3</b> | 9  | 75 519 251  | 80 211 487  | 4 692 236  | 722  | 3 | 1 |
| <b>Patient N° 3</b> | 10 | 57 691 482  | 58 809 636  | 1 118 154  | 84   | 0 | 1 |
| <b>Patient N° 3</b> | 10 | 75 778 687  | 77 170 685  | 1 391 998  | 67   | 0 | 1 |
| <b>Patient N° 3</b> | 10 | 95 859 929  | 97 069 762  | 1 209 833  | 96   | 0 | 1 |
| <b>Patient N° 3</b> | 10 | 130 248 440 | 133 996 225 | 3 747 785  | 841  | 5 | 0 |
| <b>Patient N° 3</b> | 11 | 8 380 719   | 10 848 430  | 2 467 711  | 309  | 2 | 1 |
| <b>Patient N° 3</b> | 11 | 11 670 871  | 23 675 928  | 12 005 057 | 1868 | 5 | 1 |
| <b>Patient N° 3</b> | 11 | 100 146 092 | 102 898 793 | 2 752 701  | 381  | 0 | 1 |
| <b>Patient N° 3</b> | 12 | 1 024 688   | 7 945 384   | 6 920 696  | 1160 | 4 | 1 |
| <b>Patient N° 3</b> | 12 | 73 153 191  | 74 509 618  | 1 356 427  | 98   | 1 | 1 |
| <b>Patient N° 3</b> | 12 | 111 288 843 | 113 257 970 | 1 969 127  | 88   | 0 | 1 |
| <b>Patient N° 3</b> | 18 | 22 549 451  | 33 314 352  | 10 764 901 | 1124 | 2 | 1 |
| <b>Patient N° 3</b> | 18 | 33 323 857  | 43 982 231  | 10 658 374 | 1146 | 5 | 1 |
| <b>Patient N° 3</b> | 19 | 15 113 675  | 16 879 706  | 1 766 031  | 193  | 0 | 1 |

|                     |    |             |             |            |      |   |   |
|---------------------|----|-------------|-------------|------------|------|---|---|
| <b>Patient N° 4</b> | 1  | 42 354 233  | 43 504 358  | 1 150 125  | 115  | 1 | 1 |
| <b>Patient N° 4</b> | 2  | 112 421 566 | 113 940 839 | 1 519 273  | 162  | 1 | 1 |
| <b>Patient N° 4</b> | 2  | 127 880 106 | 129 016 127 | 1 136 021  | 108  | 1 | 1 |
| <b>Patient N° 4</b> | 2  | 155 330 994 | 156 933 553 | 1 602 559  | 139  | 1 | 1 |
| <b>Patient N° 4</b> | 3  | 139 253 871 | 149 833 716 | 10 579 845 | 1260 | 2 | 1 |
| <b>Patient N° 4</b> | 4  | 22 699 639  | 30 087 239  | 7 387 600  | 972  | 3 | 1 |
| <b>Patient N° 4</b> | 4  | 127 470 966 | 129 223 362 | 1 752 396  | 111  | 0 | 1 |
| <b>Patient N° 4</b> | 4  | 143 472 696 | 145 031 841 | 1 559 145  | 78   | 0 | 1 |
| <b>Patient N° 4</b> | 5  | 23 713 221  | 24 837 899  | 1 124 678  | 78   | 0 | 1 |
| <b>Patient N° 4</b> | 5  | 42 398 305  | 44 279 163  | 1 880 858  | 91   | 1 | 1 |
| <b>Patient N° 4</b> | 5  | 61 194 553  | 62 504 074  | 1 309 521  | 112  | 0 | 1 |
| <b>Patient N° 4</b> | 8  | 111 455 605 | 113 617 156 | 2 161 551  | 107  | 0 | 1 |
| <b>Patient N° 4</b> | 9  | 123 079 481 | 124 368 674 | 1 289 193  | 87   | 0 | 1 |
| <b>Patient N° 4</b> | 10 | 25 821 161  | 29 173 102  | 3 351 941  | 415  | 1 | 1 |
| <b>Patient N° 4</b> | 10 | 114 907 055 | 122 749 548 | 7 842 493  | 1086 | 3 | 1 |
| <b>Patient N° 4</b> | 11 | 3 129 965   | 6 743 665   | 3 613 700  | 620  | 4 | 1 |
| <b>Patient N° 4</b> | 12 | 28 268 837  | 29 666 890  | 1 398 053  | 148  | 1 | 1 |
| <b>Patient N° 4</b> | 13 | 19 552 050  | 20 654 610  | 1 102 560  | 85   | 0 | 1 |
| <b>Patient N° 4</b> | 14 | 31 227 836  | 33 272 983  | 2 045 147  | 270  | 1 | 1 |
| <b>Patient N° 4</b> | 14 | 40 277 393  | 41 699 887  | 1 422 494  | 152  | 0 | 1 |
| <b>Patient N° 4</b> | 15 | 40 877 322  | 42 223 259  | 1 345 937  | 75   | 0 | 1 |
| <b>Patient N° 4</b> | 15 | 72 030 941  | 74 022 114  | 1 991 173  | 82   | 0 | 1 |
| <b>Patient N° 4</b> | 18 | 40 196 128  | 61 054 048  | 20 857 920 | 2774 | 5 | 1 |
| <b>Patient N° 4</b> | 18 | 71 623 644  | 78 015 057  | 6 391 413  | 1080 | 1 | 1 |
| <b>Patient N° 4</b> | 22 | 31 436 822  | 32 664 241  | 1 227 419  | 91   | 0 | 1 |
| <b>Patient N° 5</b> | 1  | 83 057 803  | 91 556 657  | 8 498 854  | 1019 | 5 | 1 |
| <b>Patient N° 5</b> | 1  | 91 566 457  | 94 585 009  | 3 018 552  | 274  | 2 | 1 |
| <b>Patient N° 5</b> | 1  | 95 056 901  | 103 110 933 | 8 054 032  | 859  | 5 | 0 |
| <b>Patient N° 5</b> | 1  | 103 128 845 | 108 035 245 | 4 906 400  | 367  | 5 | 0 |
| <b>Patient N° 5</b> | 1  | 108 056 892 | 118 223 984 | 10 167 092 | 1322 | 5 | 0 |
| <b>Patient N° 5</b> | 1  | 118 225 681 | 120 520 715 | 2 295 034  | 227  | 3 | 0 |
| <b>Patient N° 5</b> | 1  | 175 831 284 | 176 935 671 | 1 104 387  | 79   | 1 | 1 |
| <b>Patient N° 5</b> | 1  | 182 696 117 | 183 889 552 | 1 193 435  | 82   | 2 | 1 |

|                     |   |             |             |            |      |   |   |
|---------------------|---|-------------|-------------|------------|------|---|---|
| <b>Patient N° 5</b> | 2 | 104 047 330 | 105 176 835 | 1 129 505  | 86   | 0 | 1 |
| <b>Patient N° 5</b> | 2 | 115 683 514 | 124 018 896 | 8 335 382  | 875  | 2 | 1 |
| <b>Patient N° 5</b> | 2 | 124 869 037 | 133 165 560 | 8 296 523  | 745  | 5 | 1 |
| <b>Patient N° 5</b> | 2 | 133 778 855 | 137 556 677 | 3 777 822  | 463  | 5 | 0 |
| <b>Patient N° 5</b> | 2 | 137 565 841 | 138 787 927 | 1 222 086  | 156  | 5 | 1 |
| <b>Patient N° 5</b> | 2 | 141 848 910 | 150 177 878 | 8 328 968  | 709  | 5 | 0 |
| <b>Patient N° 5</b> | 2 | 210 386 175 | 212 274 937 | 1 888 762  | 171  | 2 | 1 |
| <b>Patient N° 5</b> | 4 | 97 549 082  | 99 023 151  | 1 474 069  | 69   | 2 | 1 |
| <b>Patient N° 5</b> | 5 | 88 888 645  | 91 478 027  | 2 589 382  | 220  | 3 | 1 |
| <b>Patient N° 5</b> | 5 | 91 556 374  | 99 664 527  | 8 108 153  | 700  | 4 | 1 |
| <b>Patient N° 5</b> | 5 | 99 699 931  | 103 200 636 | 3 500 705  | 251  | 3 | 1 |
| <b>Patient N° 5</b> | 5 | 121 426 122 | 122 755 334 | 1 329 212  | 160  | 1 | 1 |
| <b>Patient N° 5</b> | 5 | 122 762 229 | 133 075 880 | 10 313 651 | 1101 | 5 | 1 |
| <b>Patient N° 5</b> | 5 | 133 147 901 | 137 618 925 | 4 471 024  | 538  | 5 | 1 |
| <b>Patient N° 5</b> | 5 | 137 759 010 | 144 874 969 | 7 115 959  | 696  | 4 | 1 |
| <b>Patient N° 5</b> | 5 | 144 898 571 | 146 442 247 | 1 543 676  | 159  | 3 | 1 |
| <b>Patient N° 5</b> | 5 | 146 727 485 | 155 014 075 | 8 286 590  | 1120 | 5 | 1 |
| <b>Patient N° 5</b> | 5 | 155 027 573 | 160 448 976 | 5 421 403  | 768  | 4 | 1 |
| <b>Patient N° 5</b> | 5 | 160 455 580 | 162 960 118 | 2 504 538  | 259  | 5 | 0 |
| <b>Patient N° 5</b> | 5 | 165 156 306 | 171 626 110 | 6 469 804  | 1182 | 5 | 1 |
| <b>Patient N° 5</b> | 5 | 172 230 862 | 175 007 610 | 2 776 748  | 616  | 3 | 1 |
| <b>Patient N° 5</b> | 6 | 28 254 988  | 29 356 046  | 1 101 058  | 76   | 0 | 1 |
| <b>Patient N° 5</b> | 6 | 78 549 277  | 84 234 144  | 5 684 867  | 555  | 5 | 1 |
| <b>Patient N° 5</b> | 6 | 84 277 037  | 91 859 454  | 7 582 417  | 823  | 5 | 1 |
| <b>Patient N° 5</b> | 6 | 91 944 598  | 103 652 391 | 11 707 793 | 1133 | 5 | 1 |
| <b>Patient N° 5</b> | 6 | 104 628 972 | 109 558 471 | 4 929 499  | 588  | 2 | 1 |
| <b>Patient N° 5</b> | 6 | 110 813 928 | 123 191 690 | 12 377 762 | 1158 | 5 | 1 |
| <b>Patient N° 5</b> | 6 | 123 196 340 | 125 470 012 | 2 273 672  | 308  | 1 | 1 |
| <b>Patient N° 5</b> | 6 | 168 508 297 | 170 905 977 | 2 397 680  | 402  | 2 | 0 |
| <b>Patient N° 5</b> | 7 | 26 512 076  | 28 499 363  | 1 987 287  | 304  | 5 | 1 |
| <b>Patient N° 5</b> | 7 | 28 507 533  | 31 002 540  | 2 495 007  | 454  | 5 | 1 |
| <b>Patient N° 5</b> | 7 | 125 484 555 | 126 571 077 | 1 086 522  | 109  | 2 | 1 |
| <b>Patient N° 5</b> | 8 | 78 407 296  | 79 753 179  | 1 345 883  | 81   | 1 | 1 |

|                     |    |             |             |            |      |   |   |
|---------------------|----|-------------|-------------|------------|------|---|---|
| <b>Patient N° 5</b> | 10 | 57 691 482  | 59 158 985  | 1 467 503  | 99   | 0 | 1 |
| <b>Patient N° 5</b> | 11 | 46 297 631  | 49 188 297  | 2 890 666  | 68   | 2 | 1 |
| <b>Patient N° 5</b> | 13 | 22 559 190  | 24 835 739  | 2 276 549  | 507  | 2 | 1 |
| <b>Patient N° 5</b> | 13 | 25 573 633  | 31 767 035  | 6 193 402  | 1083 | 5 | 1 |
| <b>Patient N° 5</b> | 13 | 55 281 772  | 57 403 877  | 2 122 105  | 78   | 1 | 1 |
| <b>Patient N° 5</b> | 14 | 27 531 070  | 31 288 146  | 3 757 076  | 355  | 2 | 1 |
| <b>Patient N° 5</b> | 14 | 67 995 628  | 69 045 876  | 1 050 248  | 111  | 0 | 1 |
| <b>Patient N° 5</b> | 16 | 70 758 855  | 72 979 063  | 2 220 208  | 167  | 1 | 1 |
| <b>Patient N° 5</b> | 18 | 69 037 838  | 70 567 020  | 1 529 182  | 273  | 3 | 1 |
| <b>Patient N° 5</b> | 18 | 70 568 619  | 73 833 795  | 3 265 176  | 584  | 5 | 1 |
| <b>Patient N° 6</b> | 1  | 224 932 570 | 225 988 818 | 1 056 248  | 86   | 0 | 1 |
| <b>Patient N° 6</b> | 2  | 40 257 960  | 42 350 487  | 2 092 527  | 405  | 3 | 1 |
| <b>Patient N° 6</b> | 2  | 153 273 219 | 158 071 800 | 4 798 581  | 512  | 5 | 1 |
| <b>Patient N° 6</b> | 2  | 158 094 105 | 160 321 840 | 2 227 735  | 242  | 5 | 1 |
| <b>Patient N° 6</b> | 2  | 160 861 218 | 166 965 458 | 6 104 240  | 499  | 5 | 0 |
| <b>Patient N° 6</b> | 2  | 166 988 362 | 169 154 462 | 2 166 100  | 220  | 4 | 1 |
| <b>Patient N° 6</b> | 2  | 171 265 546 | 177 067 780 | 5 802 234  | 693  | 5 | 1 |
| <b>Patient N° 6</b> | 3  | 170 935 941 | 172 368 980 | 1 433 039  | 251  | 5 | 1 |
| <b>Patient N° 6</b> | 3  | 172 372 521 | 174 926 485 | 2 553 964  | 307  | 5 | 1 |
| <b>Patient N° 6</b> | 4  | 46 238 737  | 49 063 479  | 2 824 742  | 213  | 1 | 0 |
| <b>Patient N° 6</b> | 4  | 53 830 757  | 55 124 460  | 1 293 703  | 161  | 0 | 1 |
| <b>Patient N° 6</b> | 4  | 150 933 554 | 157 163 395 | 6 229 841  | 645  | 5 | 0 |
| <b>Patient N° 6</b> | 4  | 157 165 831 | 158 533 769 | 1 367 938  | 144  | 3 | 1 |
| <b>Patient N° 6</b> | 5  | 101 216 027 | 102 986 653 | 1 770 626  | 117  | 1 | 1 |
| <b>Patient N° 6</b> | 6  | 27 296 775  | 28 641 689  | 1 344 914  | 83   | 2 | 1 |
| <b>Patient N° 6</b> | 8  | 51 462 216  | 52 496 221  | 1 034 005  | 71   | 2 | 1 |
| <b>Patient N° 6</b> | 8  | 87 791 299  | 95 244 047  | 7 452 748  | 603  | 5 | 0 |
| <b>Patient N° 6</b> | 8  | 95 497 989  | 100 997 714 | 5 499 725  | 601  | 5 | 0 |
| <b>Patient N° 6</b> | 8  | 101 117 734 | 103 112 417 | 1 994 683  | 283  | 5 | 0 |
| <b>Patient N° 6</b> | 8  | 104 363 338 | 114 698 276 | 10 334 938 | 850  | 5 | 1 |
| <b>Patient N° 6</b> | 8  | 114 724 656 | 117 817 256 | 3 092 600  | 265  | 5 | 1 |
| <b>Patient N° 6</b> | 8  | 117 917 260 | 123 325 109 | 5 407 849  | 626  | 5 | 0 |
| <b>Patient N° 6</b> | 8  | 123 980 448 | 127 613 934 | 3 633 486  | 516  | 5 | 1 |

|              |    |             |             |           |     |   |   |
|--------------|----|-------------|-------------|-----------|-----|---|---|
| Patient N° 6 | 8  | 128 440 928 | 130 353 593 | 1 912 665 | 324 | 5 | 1 |
| Patient N° 6 | 8  | 130 864 813 | 135 537 174 | 4 672 361 | 893 | 5 | 1 |
| Patient N° 6 | 8  | 135 541 720 | 136 767 239 | 1 225 519 | 198 | 3 | 1 |
| Patient N° 6 | 8  | 136 772 337 | 139 157 175 | 2 384 838 | 331 | 4 | 1 |
| Patient N° 6 | 9  | 86 203 042  | 87 409 367  | 1 206 325 | 150 | 2 | 1 |
| Patient N° 6 | 11 | 339 969     | 2 766 234   | 2 426 265 | 236 | 5 | 0 |
| Patient N° 6 | 11 | 2 774 839   | 3 838 910   | 1 064 071 | 128 | 0 | 1 |
| Patient N° 6 | 11 | 3 865 786   | 6 724 381   | 2 858 595 | 526 | 5 | 1 |
| Patient N° 6 | 11 | 6 729 493   | 9 295 884   | 2 566 391 | 447 | 5 | 1 |
| Patient N° 6 | 11 | 9 352 951   | 11 422 750  | 2 069 799 | 406 | 5 | 1 |
| Patient N° 6 | 11 | 84 838 195  | 85 869 944  | 1 031 749 | 88  | 2 | 1 |
| Patient N° 6 | 11 | 105 483 661 | 106 519 130 | 1 035 469 | 104 | 0 | 1 |
| Patient N° 6 | 12 | 85 578 064  | 89 252 667  | 3 674 603 | 158 | 1 | 1 |
| Patient N° 6 | 14 | 40 183 285  | 41 265 598  | 1 082 313 | 117 | 0 | 1 |
| Patient N° 6 | 14 | 76 562 250  | 83 326 226  | 6 763 976 | 976 | 5 | 1 |
| Patient N° 6 | 15 | 74 338 939  | 79 151 286  | 4 812 347 | 328 | 5 | 1 |
| Patient N° 6 | 15 | 79 321 517  | 82 112 627  | 2 791 110 | 465 | 5 | 1 |
| Patient N° 6 | 15 | 83 670 073  | 86 320 952  | 2 650 879 | 270 | 1 | 1 |
| Patient N° 6 | 15 | 86 332 964  | 88 120 669  | 1 787 705 | 390 | 5 | 0 |
| Patient N° 6 | 15 | 88 390 517  | 91 622 281  | 3 231 764 | 420 | 5 | 1 |
| Patient N° 6 | 15 | 95 160 747  | 98 687 947  | 3 527 200 | 691 | 5 | 1 |
| Patient N° 6 | 15 | 98 704 009  | 101 679 433 | 2 975 424 | 587 | 5 | 1 |
| Patient N° 6 | 16 | 85 533 240  | 87 100 306  | 1 567 066 | 514 | 5 | 1 |
| Patient N° 6 | 16 | 87 502 815  | 90 163 275  | 2 660 460 | 292 | 5 | 1 |
| Patient N° 6 | 21 | 14 597 009  | 18 838 900  | 4 241 891 | 496 | 2 | 1 |
| Patient N° 7 | 2  | 23 871 024  | 25 359 254  | 1 488 230 | 89  | 0 | 1 |
| Patient N° 7 | 2  | 152 006 025 | 158 447 571 | 6 441 546 | 634 | 5 | 1 |
| Patient N° 7 | 2  | 159 788 918 | 164 300 859 | 4 511 941 | 339 | 5 | 1 |
| Patient N° 7 | 2  | 164 619 926 | 168 786 418 | 4 166 492 | 410 | 5 | 1 |
| Patient N° 7 | 3  | 99 051 310  | 100 550 136 | 1 498 826 | 105 | 1 | 1 |
| Patient N° 7 | 4  | 177 572 077 | 179 374 122 | 1 802 045 | 218 | 5 | 1 |
| Patient N° 7 | 5  | 59 825 300  | 60 904 429  | 1 079 129 | 73  | 1 | 1 |
| Patient N° 7 | 6  | 27 296 775  | 28 769 671  | 1 472 896 | 88  | 1 | 1 |



|                     |    |             |             |           |     |   |   |
|---------------------|----|-------------|-------------|-----------|-----|---|---|
| <b>Patient N° 7</b> | 7  | 4 384 426   | 7 734 829   | 3 350 403 | 393 | 4 | 1 |
| <b>Patient N° 7</b> | 8  | 109 774 461 | 110 758 319 | 983 858   | 75  | 0 | 1 |
| <b>Patient N° 7</b> | 10 | 104 217 415 | 105 313 230 | 1 095 815 | 67  | 1 | 1 |
| <b>Patient N° 7</b> | 11 | 19 130 993  | 23 525 279  | 4 394 286 | 802 | 5 | 1 |
| <b>Patient N° 7</b> | 11 | 24 159 696  | 28 607 245  | 4 447 549 | 483 | 5 | 1 |
| <b>Patient N° 7</b> | 11 | 103 950 742 | 105 937 044 | 1 986 302 | 124 | 2 | 1 |
| <b>Patient N° 7</b> | 11 | 132 831 793 | 134 631 823 | 1 800 030 | 415 | 5 | 0 |
| <b>Patient N° 7</b> | 13 | 52 374 489  | 53 501 200  | 1 126 711 | 90  | 0 | 1 |
| <b>Patient N° 7</b> | 13 | 72 278 579  | 75 389 543  | 3 110 964 | 514 | 2 | 1 |
| <b>Patient N° 7</b> | 13 | 76 739 402  | 80 285 558  | 3 546 156 | 424 | 5 | 1 |
| <b>Patient N° 7</b> | 13 | 80 289 116  | 85 097 830  | 4 808 714 | 469 | 5 | 1 |
| <b>Patient N° 7</b> | 13 | 85 715 146  | 92 371 090  | 6 655 944 | 618 | 5 | 1 |
| <b>Patient N° 7</b> | 14 | 62 665 000  | 67 667 402  | 5 002 402 | 468 | 5 | 1 |
| <b>Patient N° 7</b> | 14 | 69 011 205  | 75 867 306  | 6 856 101 | 915 | 5 | 0 |
| <b>Patient N° 7</b> | 14 | 77 613 858  | 79 875 300  | 2 261 442 | 331 | 2 | 1 |
| <b>Patient N° 7</b> | 14 | 80 915 590  | 84 405 596  | 3 490 006 | 433 | 5 | 1 |
| <b>Patient N° 7</b> | 14 | 85 574 003  | 92 332 722  | 6 758 719 | 851 | 5 | 1 |
| <b>Patient N° 7</b> | 14 | 92 333 611  | 94 458 513  | 2 124 902 | 340 | 2 | 1 |
| <b>Patient N° 7</b> | 15 | 32 068 300  | 33 795 950  | 1 727 650 | 264 | 2 | 1 |
| <b>Patient N° 7</b> | 15 | 33 797 342  | 36 142 420  | 2 345 078 | 349 | 5 | 1 |
| <b>Patient N° 7</b> | 15 | 84 417 316  | 85 512 205  | 1 094 889 | 92  | 2 | 1 |
| <b>Patient N° 7</b> | 17 | 46 123 698  | 50 671 032  | 4 547 334 | 489 | 5 | 1 |
| <b>Patient N° 7</b> | 17 | 51 703 484  | 55 181 938  | 3 478 454 | 405 | 3 | 1 |
| <b>Patient N° 7</b> | 17 | 55 184 769  | 64 453 228  | 9 268 459 | 707 | 4 | 1 |
| <b>Patient N° 7</b> | 17 | 64 947 310  | 71 177 139  | 6 229 829 | 885 | 4 | 1 |
| <b>Patient N° 7</b> | 17 | 71 734 008  | 75 110 034  | 3 376 026 | 415 | 5 | 1 |
| <b>Patient N° 7</b> | 17 | 75 245 211  | 76 442 641  | 1 197 430 | 159 | 3 | 1 |
| <b>Patient N° 7</b> | 18 | 26 997 913  | 34 682 970  | 7 685 057 | 774 | 5 | 1 |
| <b>Patient N° 7</b> | 18 | 35 282 864  | 38 729 426  | 3 446 562 | 335 | 3 | 1 |
| <b>Patient N° 7</b> | 18 | 44 083 807  | 47 269 694  | 3 185 887 | 476 | 5 | 1 |
| <b>Patient N° 7</b> | 18 | 48 350 316  | 53 744 545  | 5 394 229 | 599 | 5 | 1 |
| <b>Patient N° 7</b> | 18 | 53 928 436  | 55 513 044  | 1 584 608 | 206 | 0 | 1 |
| <b>Patient N° 7</b> | 18 | 55 929 965  | 58 177 124  | 2 247 159 | 410 | 3 | 1 |

---

|                     |    |            |            |           |     |   |   |
|---------------------|----|------------|------------|-----------|-----|---|---|
| <b>Patient N° 7</b> | 20 | 37 517 986 | 38 628 316 | 1 110 330 | 114 | 2 | 1 |
|---------------------|----|------------|------------|-----------|-----|---|---|

---

<sup>a</sup>N. missing: number of SNPs with missing genotype; <sup>b</sup>heterozygotes: number of SNPs with heterozygous genotype.
