# Supplementary material for: Exome sequencing in schizophrenic patients with high levels of homozygosity identifies novel and extremely rare mutations in the GABA/glutamatergic pathways
Source: PubMed Central journal article supplement (PMC5546675; doi:10.1371/journal.pone.0182778), 2017-08-07
Supplement: pone.0182778.s002.pdf [file pone.0182778.s002.pdf]

**S2 Table. Exome sequencing results**

| Sample       | Raw sequences (Gb) <sup>a</sup> | Mapped reads (M) <sup>b</sup> | Mean coverage <sup>c</sup> | % of bases covered at least 20X | Variants | SNPs   | Indels | Ti/Tv <sup>d</sup> |
|--------------|---------------------------------|-------------------------------|----------------------------|---------------------------------|----------|--------|--------|--------------------|
| Patient N° 1 | 3.6                             | 23.4                          | 56.8                       | 77.4                            | 47 955   | 45 182 | 3 247  | 2.57               |
| Patient N° 2 | 4.4                             | 28.1                          | 70.7                       | 82.1                            | 47 739   | 44 276 | 3 839  | 2.60               |
| Patient N° 3 | 5.3                             | 34.9                          | 82.4                       | 86.0                            | 50 655   | 47 902 | 3 079  | 2.54               |
| Patient N° 4 | 6.9                             | 45.7                          | 108.0                      | 92.9                            | 51 628   | 48 879 | 3 155  | 2.50               |
| Patient N° 5 | 6.9                             | 46.2                          | 106.5                      | 91.1                            | 50 848   | 48 104 | 3 091  | 2.49               |
| Patient N° 6 | 6.0                             | 39.2                          | 94.7                       | 90.2                            | 50 642   | 48 046 | 2 966  | 2.52               |
| Patient N° 7 | 9.2                             | 53.9                          | 148.4                      | 94.4                            | 51 553   | 48 760 | 3 166  | 2.55               |

<sup>a</sup> total bases sequenced;

<sup>b</sup> number of sequencing reads aligning to the reference genome;

<sup>c</sup> mean depth of coverage across the target region;

<sup>d</sup> transitions over Transversions ratio.
