# Supplementary material for: Exome sequencing in schizophrenic patients with high levels of homozygosity identifies novel and extremely rare mutations in the GABA/glutamatergic pathways
Source: PubMed Central journal article supplement (PMC5546675; doi:10.1371/journal.pone.0182778), 2017-08-07
Supplement: pone.0182778.s003.pdf [file pone.0182778.s003.pdf]

**S3 Table. LFF and LFF-D gene lists**

| Sample        | LFF genes <sup>a</sup>                                                                                                                                                                                                                                                                                                                                                                                                                                     | LFF-D genes                                                                                                                                                                                                                                                    |
|---------------|------------------------------------------------------------------------------------------------------------------------------------------------------------------------------------------------------------------------------------------------------------------------------------------------------------------------------------------------------------------------------------------------------------------------------------------------------------|----------------------------------------------------------------------------------------------------------------------------------------------------------------------------------------------------------------------------------------------------------------|
| Patients N° 1 | <i>ADIPOQ</i> , <i>CHRM3</i> , <i>HDAC10</i> , <i>KRTAP5-3</i> , <i>MIEF1</i> , <i>OR2F2</i> , <i>OXER1</i> , <i>PRKD3</i> , <i>PRR34</i> , <i>REPIN1</i> , <i>SCUBE1</i> , <i>SULT6B1</i> , <i>TPRG1</i> , <i>UBN2</i> , <i>ZNF282</i>                                                                                                                                                                                                                    | <i>SULT6B1</i> , <i>OXER1</i> , <i>PRR34</i> , <i>TPRG1</i> , <i>UBN2</i> , <i>PRKD3</i> , <i>MIEF1</i>                                                                                                                                                        |
| Patients N° 2 | <i>AASDH</i> , <i>ADAM29</i> , <i>AFP</i> , <i>AGA</i> , <i>C12orf10</i> , <b><i>CIC</i></b> , <b><i>CLOCK</i></b> , <b><i>FCGBP</i></b> , <b><i>FUCA2</i></b> , <b><i>HERC1</i></b> , <b><i>HIVEP1</i></b> , <i>IGDCC4</i> , <i>IL22RA2</i> , <i>IL23R</i> , <b><i>KRT82</i></b> , <b><i>LRP1</i></b> , <b><i>MED29</i></b> , <i>MEGF8</i> , <i>METTL21B</i> , <i>MMP19</i> , <i>MYO1A</i> , <i>PTGFR</i> , <i>SH3RF1</i> , <i>TESPA1</i> , <i>ZNF573</i> | <b><i>KRT82</i></b> , <i>C12orf10</i> , <i>IL23R</i> , <b><i>LRP1</i></b> , <i>MYO1A</i> , <b><i>HERC1</i></b> , <i>ZNF573</i> , <b><i>MED29</i></b> , <i>MEGF8</i> , <b><i>CLOCK</i></b> , <i>AFP</i> , <i>SH3RF1</i> , <i>IL22RA2</i> , <b><i>HIVEP1</i></b> |
| Patients N° 3 | <i>ANO2</i> , <i>CDKN2A</i> , <b><i>GPRIN1</i></b> , <i>IFNA1</i> , <i>IFNA10</i> , <i>IFNA16</i> , <i>METTL24</i> , <i>MICAL1</i> , <i>MRV1</i> , <b><i>NCOA2</i></b> , <i>PCSK5</i> , <i>PIK3CD</i> , <i>PRAMEF1</i> , <b><i>PREX2</i></b> , <i>SETBP1</i> , <i>ZSCAN30</i>                                                                                                                                                                              | <i>ANO2</i> , <i>ZSCAN30</i> , <i>MICAL1</i> , <i>PIK3CD</i>                                                                                                                                                                                                   |
| Patients N° 4 | <i>ART1</i> , <i>HEATR5A</i> , <i>OR51T1</i> , <i>OR52N5</i> , <i>PHLPP1</i> , <i>PNLIPRP3</i> , <i>XRN1</i>                                                                                                                                                                                                                                                                                                                                               | <i>ART1</i> , <i>OR51T1</i> , <i>XRN1</i>                                                                                                                                                                                                                      |
| Patients N° 5 | <i>ATP10B</i> , <i>C1QTNF9B</i> , <i>ERMARD</i> , <i>FAT2</i> , <i>FHL5</i> , <i>MAP3K19</i> , <i>MDN1</i> , <i>NOD1</i> , <i>OVGP1</i> , <i>PCDH12</i> , <b><i>PCDHA4</i></b> , <i>PCDHB10</i> , <i>PCDHGA1</i> , <i>PCDHGA10</i> , <i>PTPN4</i> , <b><i>REV3L</i></b> , <i>RNF217</i> , <i>SPATA13</i> , <i>TCOF1</i> , <i>ZADH2</i> , <i>ZNF19</i>                                                                                                      | <i>OVGP1</i> , <i>PTGFRN</i> , <i>ZNF19</i> , <i>MAP3K19</i> , <i>PCDHGA1</i> , <i>ATP10B</i> , <i>FHL5</i> , <b><i>REV3L</i></b> , <i>C1QTNF9B</i>                                                                                                            |
| Patients N° 6 | <i>ADAMTS7</i> , <i>ESRP1</i> , <b><i>FMNL2</i></b> , <i>GAD1</i> , <b><i>MUC5B</i></b> , <i>PHRF1</i> , <i>PKHD1L1</i> , <i>RCCD1</i> , <i>SLC26A7</i>                                                                                                                                                                                                                                                                                                    | <i>GAD1</i> , <i>SLC26A7</i>                                                                                                                                                                                                                                   |
| Patients N° 7 | <i>AP5Z1</i> , <i>EMC7</i> , <i>EML5</i> , <b><i>FBXL18</i></b> , <i>FMN1</i> , <b><i>FSCN1</i></b> , <i>NACA2</i> , <i>NCAPD3</i> , <i>NDFIP2</i> , <i>PRCD</i> , <i>QRICH2</i> , <b><i>SPTB</i></b> , <i>TTYH2</i> , <i>UTP18</i>                                                                                                                                                                                                                        | <i>TTYH2</i> , <i>PRCD</i> , <b><i>FSCN1</i></b> , <b><i>FBXL18</i></b> , <i>NACA2</i> , <i>FMN1</i>                                                                                                                                                           |

<sup>a</sup>Genes included also in the SZ-composite set are reported in bold. Genes expressed in Brain according to the to the EBI Expression Atlas database (FPKM > 1) [11] are underlined
