# Supplementary material for: Exome sequencing in schizophrenic patients with high levels of homozygosity identifies novel and extremely rare mutations in the GABA/glutamatergic pathways
Source: PubMed Central journal article supplement (PMC5546675; doi:10.1371/journal.pone.0182778), 2017-08-07
Supplement: pone.0182778.s004.pdf [file pone.0182778.s004.pdf]

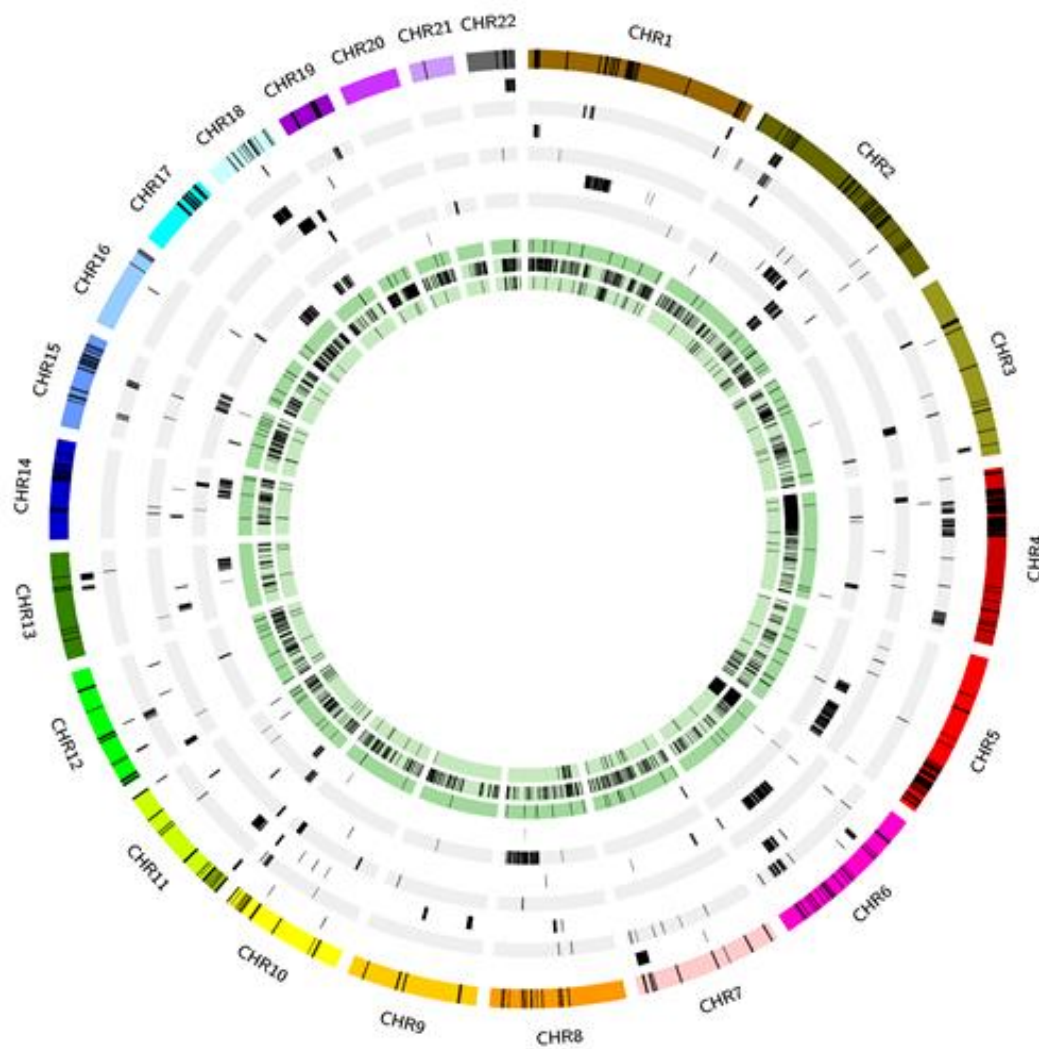

**S1 Fig. ROH region distribution across the analyzed subjects.** The circular representation shows the distribution of ROH regions (black blocks) in the seven ROH-individuals, which are reported in ascending order from the external circle as white/gray tracks. Green tracks show the genomic localization of genes/genomic regions already associated with schizophrenia in previous studies. From the external circle: SZ-GWAS set, SZ-composite set, genes from SZGR database. Black marks on chromosomes ideograms represent loci shared between schizophrenia genes/regions and our ROH region.
